# Supplementary material for: Two-Phase Analysis in Consensus Genetic Mapping
Source: PubMed Central journal article supplement (PMC3362937; doi:10.1534/g3.112.002428), 2012-05-01
Supplement: supp_2.5.537_002428SI.pdf [file supp_2.5.537_002428SI.pdf]

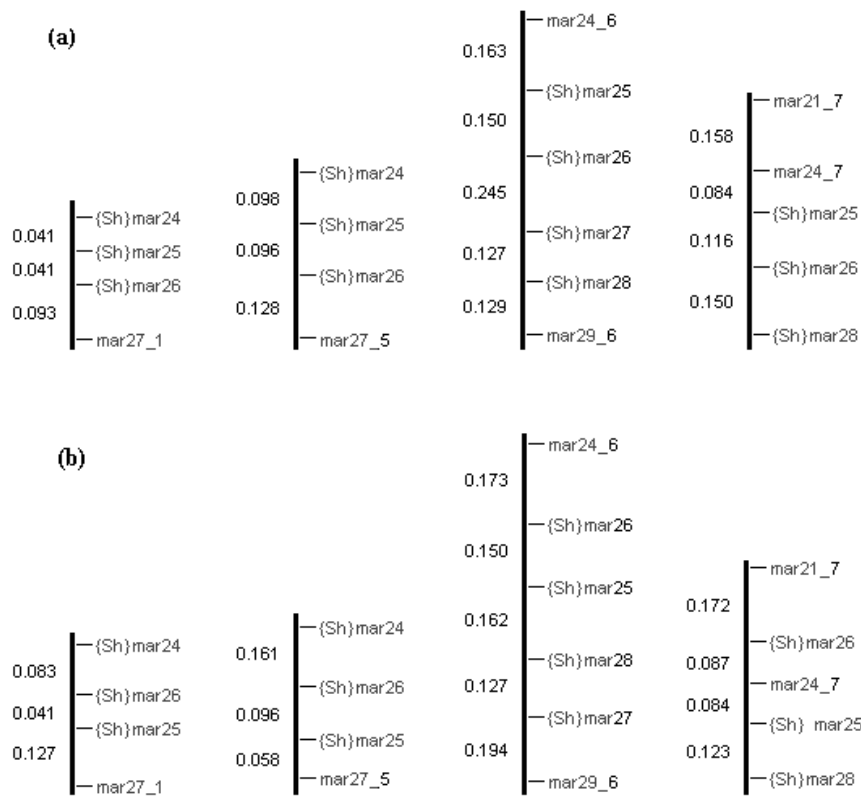

**Figure S1** Consensus<sub>orders</sub> containing markers *m25-m26*: (a) request of consensus elongates maps of set 1 from the first group (without missing data and scoring errors); (b) request of consensus elongates maps of sets 2, 3, and 4 from the second group (with missing data and scoring errors). In total, the sum of lengths 1.82 for correct (simulated) order was smaller than that for the incorrect order equal to 1.84.

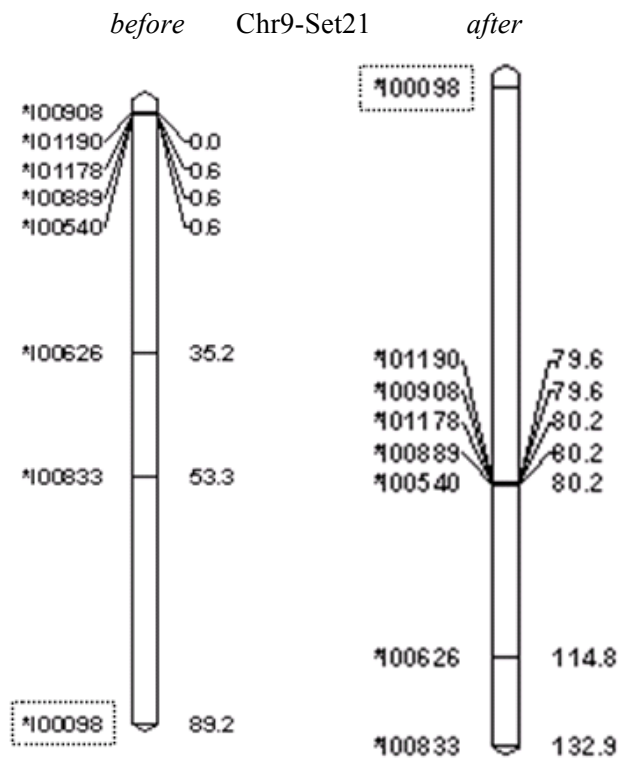

**Figure S2** A rare example when high cost of consensus cannot be reduced by deleting some marker(s).

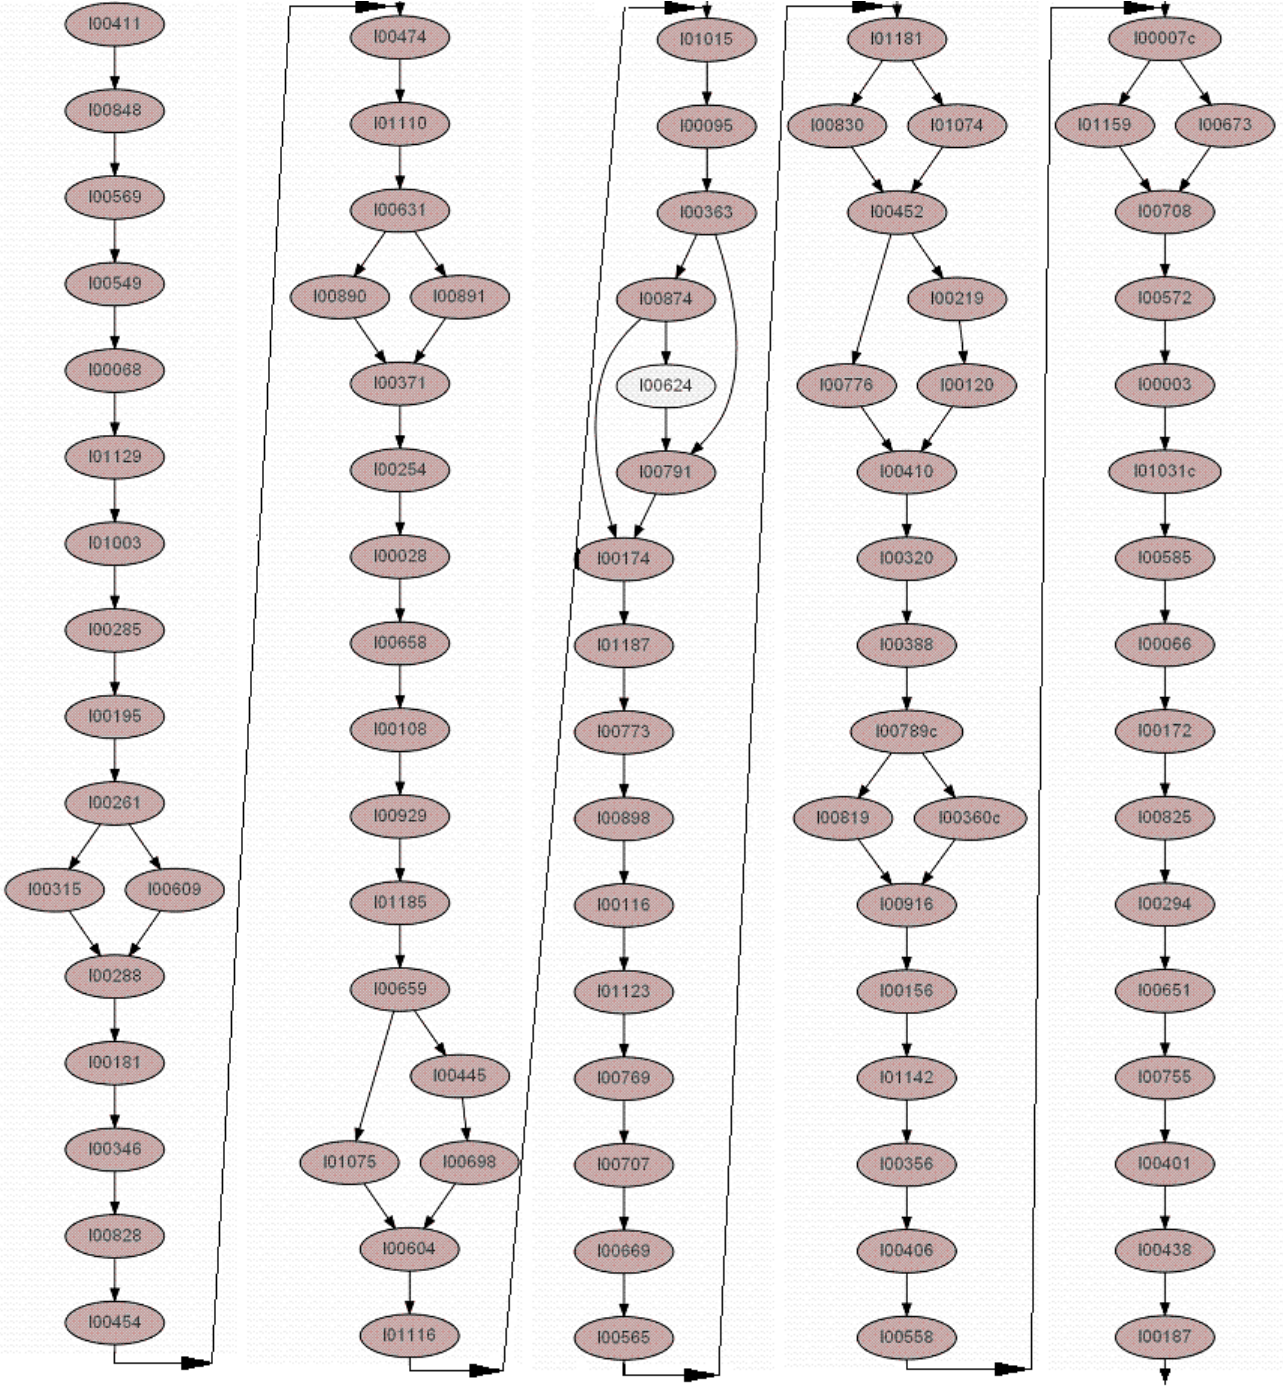

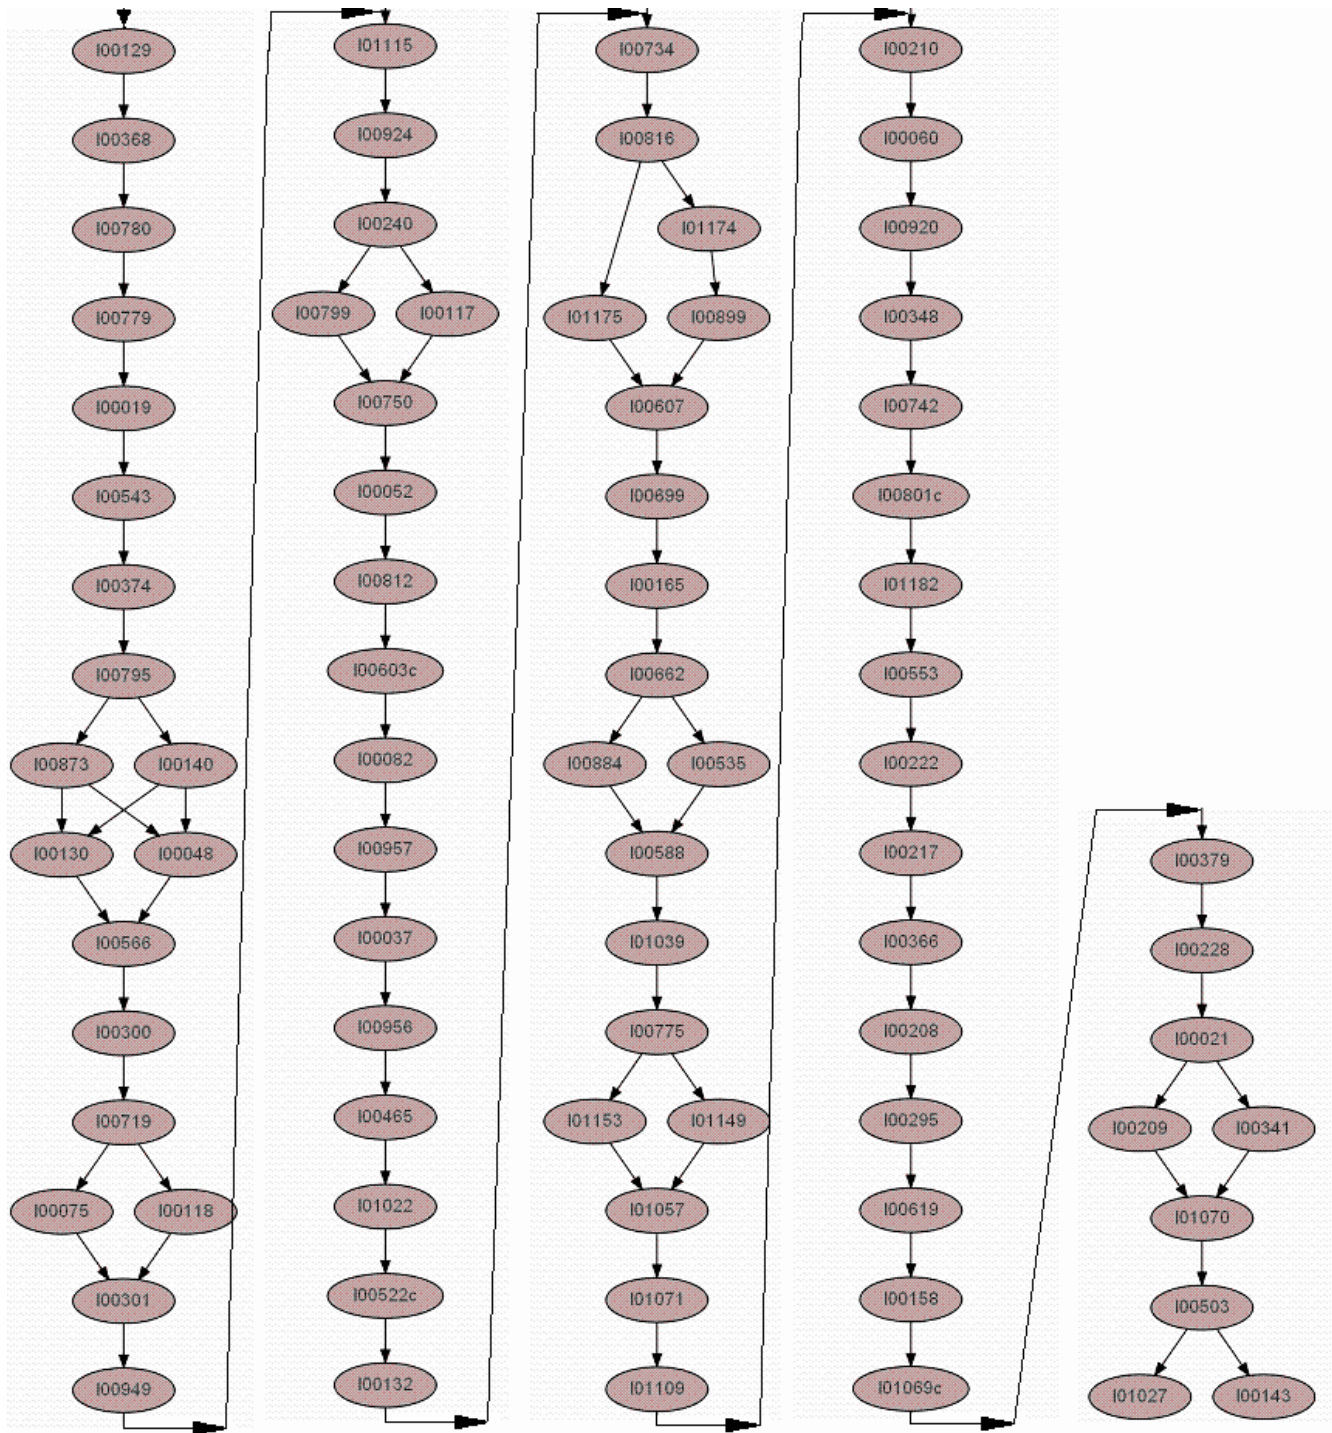

**Figure S3** The integral map of chromosome 1 (based on data of 24 maize RIL populations of maize). The predominantly linear mode of the map (relatively rare regions of branching) is caused by high proportion of shared markers and high overlap of the sets for the marker content.

**Files S1-S3  
Supporting Data**

Files S1-S3 are available for download at <http://www.g3journal.org/lookup/suppl/doi:10.1534/g3.112.002428/-/DC1>.

File S1 – This file includes single-chromosome data on 16  $F_2$  populations each with sample size 150 genotypes scored for 50 codominant markers.

File S2 - In contrast to the previous example, no missing data were in the first 8 populations but their sample size was only 50 per population, i.e., 1/3 of the sample size of the second group of 8 populations.

File S3 - Here the sample size for each of the 16 populations was 100. The first 8 populations were simulated with no missing data, while 20% of missing data was simulated for the remaining 8 populations.

**Table S1** Effect of markers scoring errors (se) on accuracy of multilocus ordering in individual and consensus mapping (simulated data of Example 2.1)

| Set #    | 1   | 2   | 3   | 4   | 5   | 6   | 7   | 8   | 9     | 10    | 11    | 12    | 13    | 14    | 15    | 16    |
|----------|-----|-----|-----|-----|-----|-----|-----|-----|-------|-------|-------|-------|-------|-------|-------|-------|
| se, %    | ← 0 |     |     |     | →   |     |     |     | ← 10  |       |       |       | →     |       |       |       |
| Ind(cM)  | 244 | 182 | 251 | 287 | 311 | 330 | 253 | 313 | 552   | 578   | 542   | 462   | 528   | 568   | 535   | 574   |
| Cons(cM) | 249 | 182 | 251 | 287 | 311 | 330 | 253 | 313 | 567   | 589   | 554   | 467   | 542   | 576   | 545   | 584   |
|          | 1   | 1   | 3   | 4   | 3   | 8   | 1   | 3   | 4 1   | 1     | 4 3   | 4 1   | 2 1   | 3     | 2     | 3     |
|          | 4   | 6   | 5   | 5   | 5   | 9   | 2   | 5   | 1 2   | 3 2   | 3 4   | 1 4   | 3 2   | 11 10 | 4     | 8     |
|          | 5   | 7   | 6   | 8   | 7   | 14  | 3   | 8   | 2 3   | 2 3   | 7     | 6     | 1 3   | 10 11 | 5     | 10    |
|          | 8   | 8   | 7   | 10  | 8   | 15  | 7   | 9   | 3 4   | 4     | 8     | 8     | 5     | 13    | 7     | 11    |
|          | 9   | 9   | 10  | 11  | 13  | 16  | 10  | 13  | 7     | 6     | 9     | 9     | 7     | 14    | 8     | 18    |
|          | 10  | 11  | 15  | 12  | 18  | 17  | 11  | 18  | 10    | 13 11 | 11    | 13    | 8     | 16    | 12    | 21    |
|          | 11  | 13  | 20  | 13  | 20  | 21  | 13  | 20  | 11    | 11 13 | 13    | 19 17 | 13    | 17    | 14 13 | 25    |
|          | 12  | 14  | 21  | 20  | 21  | 27  | 16  | 21  | 12    | 22    | 15    | 17 19 | 19 19 | 22    | 16 14 | 26    |
|          | 15  | 16  | 23  | 21  | 22  | 32  | 19  | 24  | 13    | 25    | 17 16 | 26    | 18 18 | 24    | 13 16 | 29    |
|          | 16  | 19  | 25  | 24  | 23  | 33  | 23  | 26  | 14    | 28 27 | 16 17 | 27    | 21    | 25    | 17    | 30    |
|          | 18  | 19  | 27  | 27  | 28  | 38  | 25  | 27  | 17    | 27 28 | 28    | 28    | 25 24 | 26    | 19    | 31    |
|          | 19  | 18  | 24  | 30  | 29  | 40  | 26  | 28  | 18    | 30    | 29    | 30    | 24 25 | 30    | 20    | 35 33 |
|          | 24  | 26  | 34  | 31  | 38  | 41  | 28  | 29  | 21    | 32    | 30    | 32    | 27 26 | 35    | 26 22 | 33 34 |
|          | 25  | 27  | 35  | 32  | 39  | 45  | 29  | 30  | 23    | 33    | 31    | 33    | 26 27 | 36    | 22 26 | 36 35 |
|          | 29  | 28  | 36  | 34  | 43  | 47  | 30  | 32  | 24    | 34    | 33    | 34    | 31    | 38    | 27    | 34 36 |
|          | 31  | 30  | 37  | 35  | 45  | 49  | 31  | 33  | 26 25 | 36    | 34    | 36 35 | 32    | 40    | 30 28 | 38    |
|          | 34  | 34  | 38  | 36  | 47  | 50  | 34  | 34  | 25 26 | 38 37 | 36    | 37 36 | 34 33 | 42    | 28 30 | 39    |
|          | 35  | 38  | 41  | 38  | 50  |     | 36  | 36  | 28    | 37 38 | 39    | 35 37 | 33 34 | 46    | 31    | 40    |
|          | 37  | 39  | 42  | 41  |     |     | 37  | 37  | 29    | 43 40 | 40    | 39    | 36 35 | 49    | 33 32 | 46 42 |
|          | 39  | 42  | 43  | 42  |     |     | 40  | 39  | 32 31 | 40 41 | 45 42 | 40    | 37 36 |       | 32 33 | 44 43 |
|          | 41  | 43  | 45  | 46  |     |     | 45  | 40  | 31 32 | 41 42 | 46 44 | 46 44 | 35 37 |       | 38    | 42 44 |
|          | 42  | 45  | 46  | 50  |     |     | 42  | 41  | 33    | 42 43 | 44 45 | 44 45 | 38    |       | 40    | 43 46 |
|          | 43  | 47  | 47  |     |     |     | 44  | 45  | 35    | 45    | 42 46 | 45 46 | 39    |       | 43    | 48    |
|          | 45  | 50  | 48  |     |     |     | 47  | 46  | 41 40 | 47    | 47    | 49    | 40    |       | 44    | 50    |

46  
47  
50

50

**40** 41 50  
45  
47  
49  
50

50

41  
**43** 42  
**42** 43  
45  
**49** 48  
**48** 49

**46** 45  
**45** 46  
47  
48  
49  
50

---

**Table S2** The advantage of the weighted criterion of sum of recombination rates over the voting criterion in the presence of both pure and very noisy data (simulated data of Example 2.2).

| Set #    | 1     | 2   | 3   | 4   | 5      | 6     | 7     | 8     |
|----------|-------|-----|-----|-----|--------|-------|-------|-------|
| se %     | ← 0 → |     |     |     | ← 10 → |       |       |       |
| Ind(cM)  | 244   | 182 | 251 | 287 | 552    | 578   | 542   | 462   |
| Cons(cM) | 244   | 182 | 251 | 287 | 567    | 590   | 556   | 468   |
|          | 1     | 1   | 3   | 4   | 4 1    | 1     | 4 3   | 4 1   |
|          | 4     | 6   | 5   | 5   | 1 2    | 3 2   | 3 4   | 1 4   |
|          | 5     | 7   | 6   | 8   | 2 3    | 2 3   | 7     | 6     |
|          | 8     | 8   | 7   | 10  | 3 4    | 4     | 8     | 8     |
|          | 9     | 9   | 10  | 11  | 7      | 6     | 9     | 9     |
|          | 10    | 11  | 15  | 12  | 10     | 13 11 | 11    | 13    |
|          | 11    | 13  | 20  | 13  | 11     | 11 13 | 13    | 19 17 |
|          | 12    | 14  | 21  | 20  | 12     | 26 25 | 15    | 17 19 |
|          | 15    | 16  | 23  | 21  | 13     | 25 26 | 17 17 | 26    |
|          | 16    | 19  | 25  | 24  | 14     | 28 27 | 16 16 | 27    |
|          | 19    | 21  | 27  | 27  | 17     | 27 28 | 26 25 | 28    |
|          | 24    | 24  | 30  | 28  | 21     | 30    | 25 26 | 30    |
|          | 25    | 26  | 34  | 31  | 23     | 32    | 28    | 32    |
|          | 26    | 27  | 35  | 32  | 24     | 33    | 29    | 33    |
|          | 29    | 28  | 36  | 34  | 26 25  | 34    | 30    | 34    |
|          | 31    | 30  | 37  | 35  | 25 26  | 36    | 31    | 36 35 |
|          | 34    | 34  | 38  | 36  | 28     | 38 37 | 33    | 37 36 |
|          | 35    | 38  | 41  | 38  | 29     | 37 38 | 34    | 35 37 |
|          | 37    | 39  | 42  | 41  | 32 31  | 43 40 | 36    | 39    |
|          | 39    | 42  | 43  | 42  | 31 32  | 40 41 | 39    | 40    |
|          | 41    | 43  | 45  | 46  | 33     | 41 42 | 40    | 46 44 |
|          | 42    | 45  | 46  | 50  | 35     | 42 43 | 45 44 | 44 45 |
|          | 43    | 47  | 47  |     | 41 40  | 45    | 46 42 | 45 46 |
|          | 45    | 50  |     |     | 40 41  | 47    | 44 45 | 49    |
|          | 46    |     |     |     | 45     | 50    | 42 46 | 50    |
|          | 47    |     |     |     | 47     |       | 47    |       |
|          | 50    |     |     |     | 49     |       |       |       |
|          |       |     |     |     | 50     |       |       |       |



**Table S3 The lengths of the chromosomes after individual and consensus analysis allowing to detect the chromosomes with high cost of consensus ordering: data on six BC maize sets**

| Chr # | Phase             | set1  | set2  | set3  | set4  | set5  | set6  |
|-------|-------------------|-------|-------|-------|-------|-------|-------|
| 1     | <i>before</i>     | 243.6 | 212.0 | 226.8 | 184.9 | 202.5 | 234.2 |
|       | <i>after</i>      | 245.7 | 212.1 | 226.8 | 184.9 | 203.6 | 234.2 |
| 2     | <i>before</i>     | 146.5 | 144.8 | 121.2 | 60.5  | 170.3 | 95.5  |
|       | <i>after</i>      | 146.5 | 167.6 | 123.4 | 61.5  | 170.4 | 95.5  |
|       | <i>after-crt</i>  | 146.5 | 144.8 | 123.4 | 61.5  | 170.3 | 95.5  |
| 3     | <i>before</i>     | 154.1 | 167.8 | 147.9 | 172.8 | 140.3 | 117.0 |
|       | <i>after</i>      | 154.1 | 167.8 | 147.9 | 172.8 | 144.6 | 117.0 |
| 4     | <i>before</i>     | 100.6 | 158.9 | 142.0 | 144.4 | 123.9 | 105.2 |
|       | <i>after</i>      | 100.6 | 158.7 | 142.0 | 144.4 | 123.9 | 105.2 |
| 5     | <i>before</i>     | 143.5 | 157.5 | 158.3 | 162.3 | 136.2 | 151.2 |
|       | <i>before-crt</i> | 143.5 | 157.5 | 135.2 | 162.3 | 136.2 | 151.2 |
|       | <i>after</i>      | 143.5 | 157.5 | 166.4 | 163.5 | 136.2 | 151.2 |
|       | <i>after-crt</i>  | 143.5 | 157.5 | 137.8 | 163.5 | 136.2 | 151.2 |
| 6     | <i>before</i>     | 104.5 | 139.6 | 53.6  | 120.9 | 125.6 | 83.4  |
|       | <i>after</i>      | 104.5 | 139.8 | 53.6  | 211.8 | 128.9 | 83.4  |
|       | <i>after-crt</i>  | 104.5 | 139.7 | 53.6  | 120.7 | 125.7 | 83.4  |
| 7     | <i>before</i>     | 111.9 | 139.8 | 191.7 | 111.8 | 124.3 | 92.0  |
|       | <i>before-crt</i> | 111.9 | 139.8 | 162.8 | 111.8 | 124.3 | 92.0  |
|       | <i>after</i>      | 111.9 | 139.8 | 200.6 | 111.8 | 124.3 | 92.0  |
| 8     | <i>after-crt</i>  | 111.9 | 139.8 | 167.2 | 111.8 | 124.3 | 92.0  |
|       | <i>before</i>     | 133.4 | 141.8 | 114.5 | 104.6 | 145.7 | 86.7  |
| 9     | <i>after</i>      | 133.4 | 141.8 | 121.0 | 104.6 | 145.7 | 86.7  |
|       | <i>before</i>     | 132.3 | 119.1 | 136.3 | 139.8 | 97.8  | 46.2  |
| 10    | <i>after</i>      | 132.3 | 119.1 | 136.3 | 139.8 | 97.8  | 46.2  |
|       | <i>before</i>     | 97.2  | 114.1 | 112.1 | 75.9  | 109.3 | 58.9  |
|       | <i>after</i>      | 97.2  | 114.2 | 115.3 | 75.9  | 111.5 | 58.9  |

Notes: *before* – the lengths (in cM) of the map variants after individual analysis of separate sets but before the consensus analysis; *before-crt* – the same as *before* but after removing some markers of chromosomes 5 and 7 in set #3; *after* - the lengths of the map variants after the consensus analysis; *after-crt* – the same as *after* but after removing some markers of set2-Chr2, set3-Chr5, set4-Chr6, and set3-Chr7

**Table S4** The lengths of the chromosomes after individual and consensus analysis allowing to detect the chromosomes with high cost of consensus ordering: data on 24 RIL maize sets

| Chr   | b/<br>a | Sets (mapping populations) |           |            |           |       |           |           |       |            |            |            |            |
|-------|---------|----------------------------|-----------|------------|-----------|-------|-----------|-----------|-------|------------|------------|------------|------------|
| Chr 1 |         | set1                       | set2      | set3       | set4      | set5  | set6      | set7      | set8  | set9       | set10      | set11      | set12      |
|       | b       | 170.<br>5                  | 158.<br>1 | 198.3      | 160.<br>8 | 201.2 | 175.<br>2 | 151.<br>8 | 180.7 | 166.8      | 164.1      | 160.2      | 157.2      |
|       | a       | 170.<br>6                  | 159.<br>6 | 199.7      | 161.<br>5 | 203.3 | 175.<br>6 | 153.<br>4 | 182.0 | 169.0      | 164.9      | 161.2      | 159.8      |
|       |         | set1<br>4                  | set1<br>5 | set16      | set1<br>8 | set19 | set2<br>0 | set2<br>1 | set22 | set23      | set24<br>* | set25<br>* | set26      |
|       | b       | 166.<br>8                  | 143.<br>1 | 157.2      | 149.<br>8 | 172.2 | 188.<br>8 | 131.<br>0 | 165.1 | 113.1      | 134.4      | 139.1      | 179.3      |
|       | a       | 170.<br>1                  | 143.<br>1 | 157.3      | 150.<br>3 | 172.8 | 189.<br>4 | 131.<br>0 | 165.8 | 113.9      | 134.8      | 139.5      | 179.6      |
| Chr 2 |         | set1                       | set2      | set3       | set4      | set5  | set6      | set7      | set8  | set9       | set10      | set11      | set12      |
|       | b       | 131.<br>5                  | 120.<br>9 | 161.1      | 124.<br>5 | 133.4 | 150.<br>2 | 134.<br>0 | 143.3 | 123.3      | 136.2      | 123.1      | 148.1      |
|       | a       | 132.<br>0                  | 122.<br>1 | 161.4      | 126.<br>1 | 134.1 | 150.<br>2 | 134.<br>4 | 143.8 | 124.0      | 137.1      | 123.1      | 148.8      |
|       |         | set1<br>4                  | set1<br>5 | set16<br>* | set1<br>8 | set19 | set2<br>0 | set2<br>1 | set22 | set23<br>* | set24<br>* | set25      | set26<br>* |
|       | b       | 112.<br>1                  | 103.<br>3 | 43.3       | 116.<br>3 | 121.8 | 138.<br>4 | 64.9      | 131.2 | 44.5       | 39.1       | 145.8      | 35.0       |
|       | a       | 112.<br>4                  | 103.<br>3 | 43.5       | 116.<br>7 | 121.8 | 138.<br>7 | 64.9      | 132.0 | 44.9       | 39.2       | 145.8      | 35.0       |
| Chr 3 |         | set1<br>*                  | set2      | set3       | set4      | set5  | set6      | set7      | set8  | set9       | set10      | set11      | set12      |
|       | b       | 77.1                       | 127.<br>8 | 137.4      | 138.<br>5 | 32.9  | 97.2      | 118.<br>0 | 144.8 | 120.1      | 145.6      | 140.1      | 143.5      |
|       | a       | 77.1                       | 128.<br>9 | 138.3      | 138.<br>7 | 34.0  | 97.6      | 118.<br>0 | 144.8 | 120.3      | 146.9      | 140.3      | 143.8      |
|       |         | set1<br>4                  | set1<br>5 | set16      | set1<br>8 | set19 | set2<br>0 | set2<br>1 | set22 | set23      | set24      | set25      | set26      |
|       | b       | 125.<br>0                  | -         | 117.5      | 107.<br>2 | 114.8 | 137.<br>8 | 135.<br>7 | 113.1 | -          | 54.4       | 98.3       | 80.0       |
|       | a       | 125.<br>1                  | -         | 118.4      | 107.<br>2 | 115.2 | 138.<br>1 | 135.<br>7 | 113.1 | -          | 54.9       | 98.3       | 80.0       |
| Chr 4 |         | set1                       | set2      | set3       | set4      | set5* | set6      | set7      | set8  | set9       | set10      | set11      | set12      |
|       | b       | 121.<br>3                  | 121.<br>6 | 132.9      | 99.0      | 59.8  | 65.4      | 97.4      | 109.7 | 111.4      | 112.0      | 77.4       | 72.0       |
|       | a       | 121.<br>6                  | 121.<br>9 | 133.2      | 99.6      | 60.4  | 65.4      | 97.9      | 109.8 | 112.0      | 112.0      | 77.4       | 72.0       |
|       |         | set1<br>4                  | set1<br>5 | set16      | set1<br>8 | set19 | set2<br>0 | set2<br>1 | set22 | set23      | set24      | set25      | set26      |
|       | b       | 93.1                       | 49.2      | 103.4      | 103.<br>1 | 113.5 | 114.<br>9 | 51.5      | 125.8 | 19.5       | -          | 130.7      | 97.3       |
|       | a       | 93.1                       | 49.2      | 103.4      | 103.<br>1 | 113.5 | 114.<br>9 | 51.8      | 126.1 | 19.6       | -          | 131.3      | 100.7      |
| Chr 5 |         | set1                       | set2      | set3       | set4      | set5  | set6      | set7      | set8  | set9       | set10      | set11      | set12      |
|       | b       | 116.                       | 101.      | 134.6      | 128.      | 149.8 | 147.      | 122.      | 143.8 | 136.4      | 129.2      | 119.0      | 106.5      |

|   |       |       |       |       |       |       |       |       |       |       |       |       |
|---|-------|-------|-------|-------|-------|-------|-------|-------|-------|-------|-------|-------|
|   | 2     | 4     |       | 9     |       | 4     | 6     |       |       |       |       |       |
| a | 116.9 | 101.5 | 137.0 | 130.1 | 150.4 | 148.1 | 123.2 | 145.0 | 136.6 | 129.5 | 119.1 | 107.4 |
|   | set1  | set1  | set16 | set1  | set19 | set2  | set2  | set22 | set23 | set24 | set25 | set26 |
|   | 4     | 5     |       | 8     | *     | 0     | 1     | *     |       |       |       |       |
| b | 113.1 | -     | 104.0 | 121.6 | 77.8  | 104.2 | 91.2  | 65.3  | -     | 91.2  | 96.5  | 67.5  |
| a | 115.8 | -     | 104.9 | 122.8 | 78.4  | 106.3 | 91.9  | 66.2  | -     | 91.2  | 97.1  | 67.6  |

Table 4s continued

|       |        |        |        |       |       |        |       |       |       |       |       |        |
|-------|--------|--------|--------|-------|-------|--------|-------|-------|-------|-------|-------|--------|
| Chr6  | set1   | set2   | set3   | set4  | set5  | set6   | set7* | set8  | set9  | set10 | set11 | set12  |
| b     | 77.4   | 92.5   | 95.2   | 79.7  | 96.1  | 95.0   | 39.0  | 101.1 | 50.1  | 88.7  | 83.8  | 90.5   |
| a     | 77.4   | 93.6   | 99.0   | 79.9  | 96.2  | 95.0   | 39.0  | 101.4 | 51.0  | 88.7  | 83.8  | 90.6   |
|       | set14  | set15  | set16  | set18 | set19 | set20* | set21 | set22 | set23 | set24 | set25 | set26  |
| b     | 85.9   | 100.0  | 82.4   | 90.6  | 86.1  | 38.8   | 41.8  | 87.9  | 15.4  | 58.2  | 101.3 | 107.1  |
| a     | 86.2   | 100.8  | 82.4   | 90.8  | 86.5  | 38.8   | 42.4  | 88.2  | 15.4  | 58.2  | 101.3 | 107.1  |
| Chr7  | set1   | set2   | set3*  | set4* | set5  | set6   | set7  | set8  | set9  | set10 | set11 | set12  |
| b     | 106.5  | 103.8  | 58.8   | 45.1  | 65.9  | 101.7  | 87.2  | 108.4 | 118.8 | 110.0 | 105.7 | 109.3  |
| a     | 106.9  | 103.8  | 59.2   | 45.1  | 65.9  | 101.7  | 87.2  | 112.8 | 118.8 | 110.2 | 105.9 | 109.6  |
|       | set14  | set15* | set16  | set18 | set19 | set20  | set21 | set22 | set23 | set24 | set25 | set26  |
| b     | 114.6  | 49.3   | 107.9  | 81.9  | 108.9 | 68.0   | 71.4  | 110.5 | 49.4  | 0.3   | 114.5 | 105.6  |
| a     | 115.3  | 49.3   | 108.3  | 82.2  | 109.8 | 68.0   | 71.7  | 117.4 | 49.5  | 0.3   | 114.5 | 107.6  |
| Chr8  | set1   | set2   | set3   | set4  | set5  | set6   | set7  | set8  | set9  | set10 | set11 | set12  |
| b     | 107.1  | 113.3  | 121.0  | 91.2  | 101.3 | 110.9  | 69.0  | 115.7 | 117.5 | 116.4 | 98.4  | 97.1   |
| a     | 107.4  | 113.6  | 121.7  | 92.0  | 101.6 | 110.9  | 69.0  | 116.1 | 117.6 | 116.4 | 98.8  | 97.1   |
|       | set14  | set15  | set16  | set18 | set19 | set20  | set21 | set22 | set23 | set24 | set25 | set26  |
| b     | 93.5   | 79.2   | 105.7  | 99.1  | 101.9 | 96.8   | 117.5 | 117.2 | 62.0  | 65.4  | 68.7  | 116.0  |
| a     | 94.1   | 79.3   | 106.0  | 99.1  | 102.3 | 96.8   | 117.5 | 117.5 | 62.0  | 65.4  | 68.7  | 116.8  |
| Chr9  | set1   | set2   | set3   | set4  | set5  | set6   | set7  | set8  | set9  | set10 | set11 | set12  |
| b     | 89.4   | 93.2   | 105.5  | 97.8  | 65.9  | 76.9   | 91.1  | 104.5 | 93.7  | 105.7 | 110.0 | 94.6   |
| a     | 89.9   | 94.1   | 110.8  | 98.5  | 65.9  | 77.3   | 91.7  | 104.5 | 94.1  | 106.3 | 110.9 | 94.6   |
|       | set14  | set15  | set16* | set18 | set19 | set20  | set21 | set22 | set23 | set24 | set25 | set26  |
| b     | 85.4   | 80.4   | 59.7   | 90.6  | 92.2  | 76.5   | 89.2  | 94.5  | 48.4  | 15.5  | 106.7 | 106.5  |
| a     | 85.5   | 81.2   | 62.6   | 92.0  | 92.5  | 76.6   | 132.9 | 94.5  | 50.2  | 15.5  | 106.7 | 106.9  |
| Chr10 | set1   | set2   | set3   | set4  | set5  | set6   | set7  | set8  | set9  | set10 | set11 | set12  |
| b     | 71.6   | 92.8   | 98.3   | 89.8  | -     | 74.2   | 77.2  | 81.4  | 82.9  | 90.4  | 91.0  | 80.1   |
| a     | 71.6   | 93.6   | 98.3   | 90.5  | -     | 74.2   | 77.7  | 81.4  | 82.9  | 90.4  | 91.0  | 80.1   |
|       | set14* | set15  | set16  | set18 | set19 | set20  | set21 | set22 | set23 | set24 | set25 | set26* |
| b     | 53.1   | 81.8   | 80.7   | 73.2  | 86.8  | 103.1  | 75.8  | 84.5  | 34.6  | 58.1  | 88.6  | 6.4    |
| a     | 53.1   | 81.8   | 81.0   | 73.6  | 86.8  | 103.1  | 75.8  | 84.8  | 34.6  | 58.1  | 89.0  | 6.4    |

Notes: b and a – represent two phases, *before* and *after* of the proposed consensus mapping approach. Set-chromosome combinations with high or moderate cost of consensus are marked by frames (especially set21-Chr9). The situation with set21-Chr9 is discussed in more detail in the text. \* marks the sets where the considered chromosome is represented by several fragment (linkage groups); for such cases the sum of the fragment lengths (in cM) is presented.
