# Supplementary material for: Two-Phase Analysis in Consensus Genetic Mapping
Source: PubMed Central journal article supplement (PMC3362937; doi:10.1534/g3.112.002428), 2012-05-01
Supplement: supp_2.5.537_FigureS2.pdf [file supp_2.5.537_FigureS2.pdf]

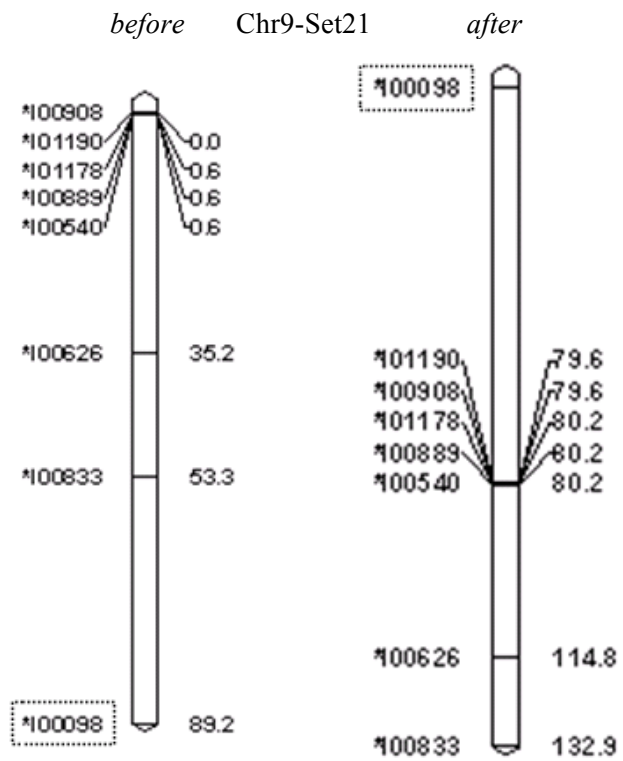

**Figure S2** A rare example when high cost of consensus cannot be reduced by deleting some marker(s).
