# Supplementary material for: Two-Phase Analysis in Consensus Genetic Mapping
Source: PubMed Central journal article supplement (PMC3362937; doi:10.1534/g3.112.002428), 2012-05-01
Supplement: supp_2.5.537_FigureS3.pdf [file supp_2.5.537_FigureS3.pdf]

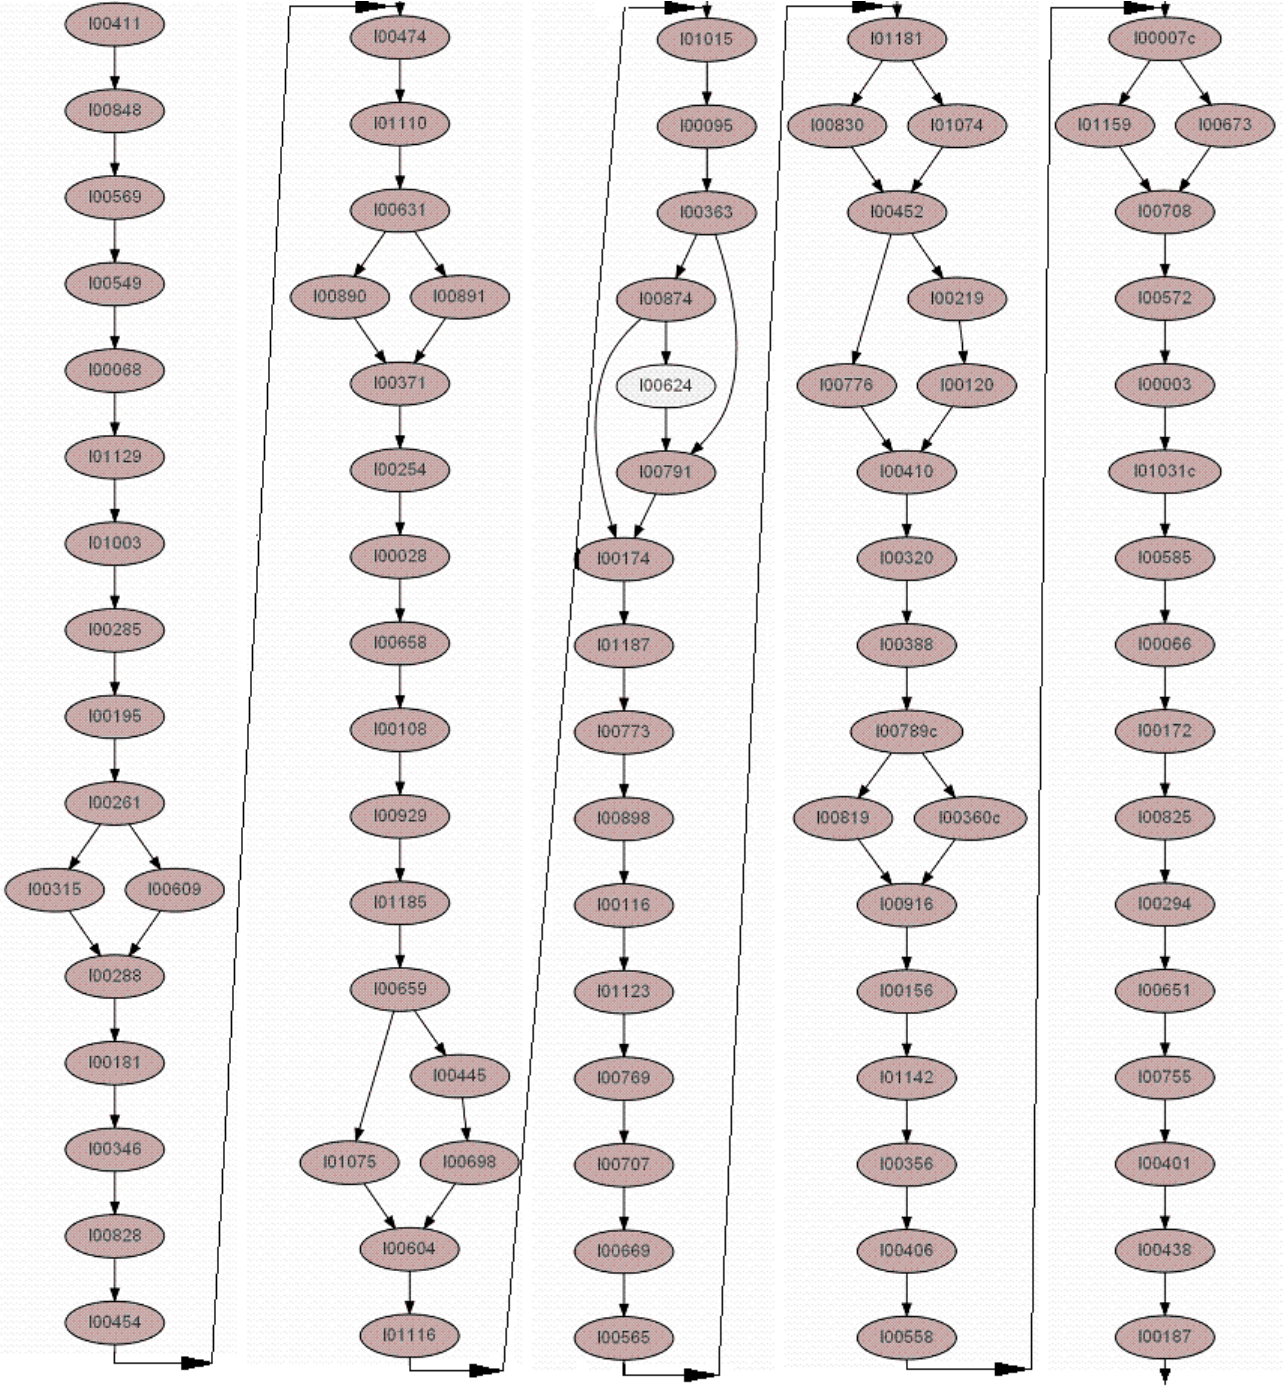

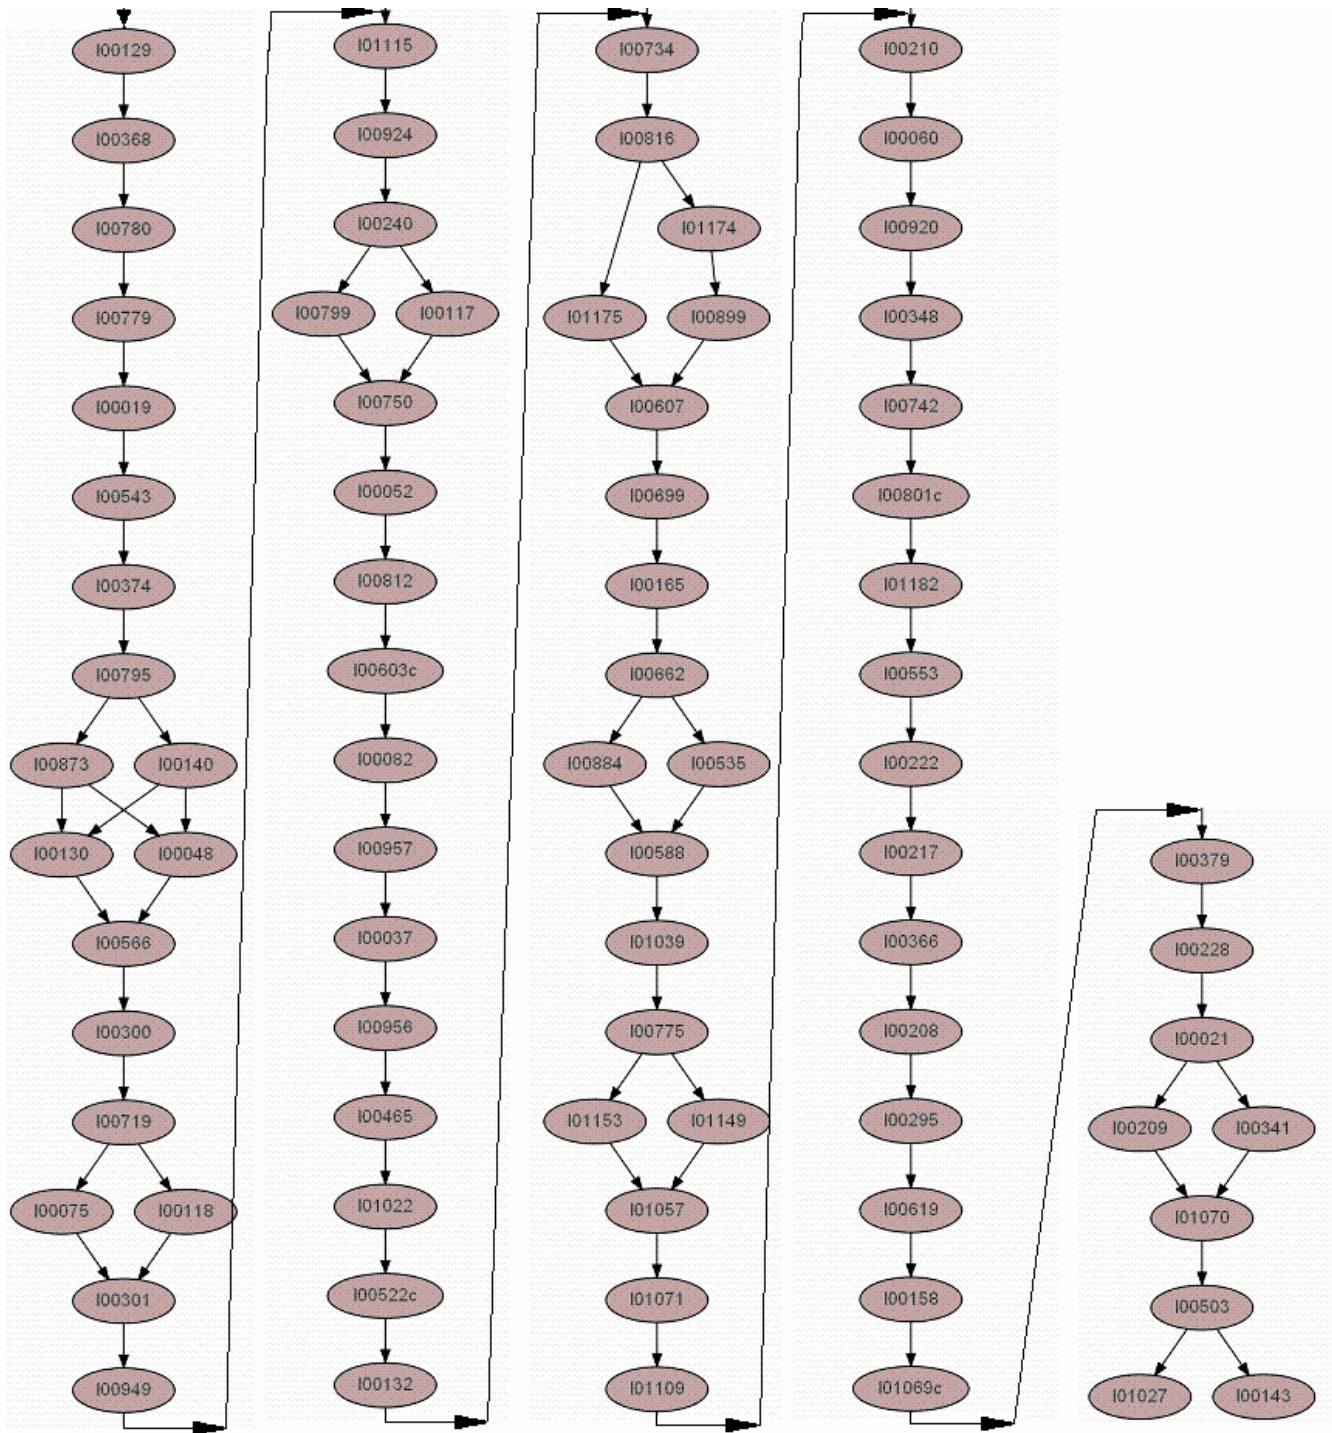

**Figure S3** The integral map of chromosome 1 (based on data of 24 maize RIL populations of maize). The predominantly linear mode of the map (relatively rare regions of branching) is caused by high proportion of shared markers and high overlap of the sets for the marker content.
