# Supplementary material for: Two-Phase Analysis in Consensus Genetic Mapping
Source: PubMed Central journal article supplement (PMC3362937; doi:10.1534/g3.112.002428), 2012-05-01
Supplement: supp_2.5.537_TableS1.pdf [file supp_2.5.537_TableS1.pdf]

**Table S1** Effect of markers scoring errors (se) on accuracy of multilocus ordering in individual and consensus mapping (simulated data of Example 2.1)

| Set #    | 1   | 2   | 3   | 4   | 5   | 6   | 7   | 8   | 9     | 10    | 11    | 12    | 13    | 14    | 15    | 16    |
|----------|-----|-----|-----|-----|-----|-----|-----|-----|-------|-------|-------|-------|-------|-------|-------|-------|
| se, %    | ← 0 |     |     |     | →   |     |     |     | ← 10  |       |       |       | →     |       |       |       |
| Ind(cM)  | 244 | 182 | 251 | 287 | 311 | 330 | 253 | 313 | 552   | 578   | 542   | 462   | 528   | 568   | 535   | 574   |
| Cons(cM) | 249 | 182 | 251 | 287 | 311 | 330 | 253 | 313 | 567   | 589   | 554   | 467   | 542   | 576   | 545   | 584   |
|          | 1   | 1   | 3   | 4   | 3   | 8   | 1   | 3   | 4 1   | 1     | 4 3   | 4 1   | 2 1   | 3     | 2     | 3     |
|          | 4   | 6   | 5   | 5   | 5   | 9   | 2   | 5   | 1 2   | 3 2   | 3 4   | 1 4   | 3 2   | 11 10 | 4     | 8     |
|          | 5   | 7   | 6   | 8   | 7   | 14  | 3   | 8   | 2 3   | 2 3   | 7     | 6     | 1 3   | 10 11 | 5     | 10    |
|          | 8   | 8   | 7   | 10  | 8   | 15  | 7   | 9   | 3 4   | 4     | 8     | 8     | 5     | 13    | 7     | 11    |
|          | 9   | 9   | 10  | 11  | 13  | 16  | 10  | 13  | 7     | 6     | 9     | 9     | 7     | 14    | 8     | 18    |
|          | 10  | 11  | 15  | 12  | 18  | 17  | 11  | 18  | 10    | 13 11 | 11    | 13    | 8     | 16    | 12    | 21    |
|          | 11  | 13  | 20  | 13  | 20  | 21  | 13  | 20  | 11    | 11 13 | 13    | 19 17 | 13    | 17    | 14 13 | 25    |
|          | 12  | 14  | 21  | 20  | 21  | 27  | 16  | 21  | 12    | 22    | 15    | 17 19 | 19 19 | 22    | 16 14 | 26    |
|          | 15  | 16  | 23  | 21  | 22  | 32  | 19  | 24  | 13    | 25    | 17 16 | 26    | 18 18 | 24    | 13 16 | 29    |
|          | 16  | 19  | 25  | 24  | 23  | 33  | 23  | 26  | 14    | 28 27 | 16 17 | 27    | 21    | 25    | 17    | 30    |
|          | 18  | 19  | 27  | 27  | 28  | 38  | 25  | 27  | 17    | 27 28 | 28    | 28    | 25 24 | 26    | 19    | 31    |
|          | 19  | 18  | 24  | 30  | 29  | 40  | 26  | 28  | 18    | 30    | 29    | 30    | 24 25 | 30    | 20    | 35 33 |
|          | 24  | 26  | 34  | 31  | 38  | 41  | 28  | 29  | 21    | 32    | 30    | 32    | 27 26 | 35    | 26 22 | 33 34 |
|          | 25  | 27  | 35  | 32  | 39  | 45  | 29  | 30  | 23    | 33    | 31    | 33    | 26 27 | 36    | 22 26 | 36 35 |
|          | 29  | 28  | 36  | 34  | 43  | 47  | 30  | 32  | 24    | 34    | 33    | 34    | 31    | 38    | 27    | 34 36 |
|          | 31  | 30  | 37  | 35  | 45  | 49  | 31  | 33  | 26 25 | 36    | 34    | 36 35 | 32    | 40    | 30 28 | 38    |
|          | 34  | 34  | 38  | 36  | 47  | 50  | 34  | 34  | 25 26 | 38 37 | 36    | 37 36 | 34 33 | 42    | 28 30 | 39    |
|          | 35  | 38  | 41  | 38  | 50  |     | 36  | 36  | 28    | 37 38 | 39    | 35 37 | 33 34 | 46    | 31    | 40    |
|          | 37  | 39  | 42  | 41  |     |     | 37  | 37  | 29    | 43 40 | 40    | 39    | 36 35 | 49    | 33 32 | 46 42 |
|          | 39  | 42  | 43  | 42  |     |     | 40  | 39  | 32 31 | 40 41 | 45 42 | 40    | 37 36 |       | 32 33 | 44 43 |
|          | 41  | 43  | 45  | 46  |     |     | 45  | 40  | 31 32 | 41 42 | 46 44 | 46 44 | 35 37 |       | 38    | 42 44 |
|          | 42  | 45  | 46  | 50  |     |     | 42  | 41  | 33    | 42 43 | 44 45 | 44 45 | 38    |       | 40    | 43 46 |
|          | 43  | 47  | 47  |     |     |     | 44  | 45  | 35    | 45    | 42 46 | 45 46 | 39    |       | 43    | 48    |
|          | 45  | 50  | 48  |     |     |     | 47  | 46  | 41 40 | 47    | 47    | 49    | 40    |       | 44    | 50    |

46  
47  
50

50

**40** 41 50  
45  
47  
49  
50

50

41  
**43** 42  
**42** 43  
45  
**49** 48  
**48** 49

**46** 45  
**45** 46  
47  
48  
49  
50

---
