# Supplementary material for: Two-Phase Analysis in Consensus Genetic Mapping
Source: PubMed Central journal article supplement (PMC3362937; doi:10.1534/g3.112.002428), 2012-05-01
Supplement: supp_2.5.537_TableS2.pdf [file supp_2.5.537_TableS2.pdf]

**Table S2** The advantage of the weighted criterion of sum of recombination rates over the voting criterion in the presence of both pure and very noisy data (simulated data of Example 2.2).

| Set #    | 1     | 2   | 3   | 4   | 5      | 6     | 7     | 8     |
|----------|-------|-----|-----|-----|--------|-------|-------|-------|
| se %     | ← 0 → |     |     |     | ← 10 → |       |       |       |
| Ind(cM)  | 244   | 182 | 251 | 287 | 552    | 578   | 542   | 462   |
| Cons(cM) | 244   | 182 | 251 | 287 | 567    | 590   | 556   | 468   |
|          | 1     | 1   | 3   | 4   | 4 1    | 1     | 4 3   | 4 1   |
|          | 4     | 6   | 5   | 5   | 1 2    | 3 2   | 3 4   | 1 4   |
|          | 5     | 7   | 6   | 8   | 2 3    | 2 3   | 7     | 6     |
|          | 8     | 8   | 7   | 10  | 3 4    | 4     | 8     | 8     |
|          | 9     | 9   | 10  | 11  | 7      | 6     | 9     | 9     |
|          | 10    | 11  | 15  | 12  | 10     | 13 11 | 11    | 13    |
|          | 11    | 13  | 20  | 13  | 11     | 11 13 | 13    | 19 17 |
|          | 12    | 14  | 21  | 20  | 12     | 26 25 | 15    | 17 19 |
|          | 15    | 16  | 23  | 21  | 13     | 25 26 | 17 17 | 26    |
|          | 16    | 19  | 25  | 24  | 14     | 28 27 | 16 16 | 27    |
|          | 19    | 21  | 27  | 27  | 17     | 27 28 | 26 25 | 28    |
|          | 24    | 24  | 30  | 28  | 21     | 30    | 25 26 | 30    |
|          | 25    | 26  | 34  | 31  | 23     | 32    | 28    | 32    |
|          | 26    | 27  | 35  | 32  | 24     | 33    | 29    | 33    |
|          | 29    | 28  | 36  | 34  | 26 25  | 34    | 30    | 34    |
|          | 31    | 30  | 37  | 35  | 25 26  | 36    | 31    | 36 35 |
|          | 34    | 34  | 38  | 36  | 28     | 38 37 | 33    | 37 36 |
|          | 35    | 38  | 41  | 38  | 29     | 37 38 | 34    | 35 37 |
|          | 37    | 39  | 42  | 41  | 32 31  | 43 40 | 36    | 39    |
|          | 39    | 42  | 43  | 42  | 31 32  | 40 41 | 39    | 40    |
|          | 41    | 43  | 45  | 46  | 33     | 41 42 | 40    | 46 44 |
|          | 42    | 45  | 46  | 50  | 35     | 42 43 | 45 44 | 44 45 |
|          | 43    | 47  | 47  |     | 41 40  | 45    | 46 42 | 45 46 |
|          | 45    | 50  |     |     | 40 41  | 47    | 44 45 | 49    |
|          | 46    |     |     |     | 45     | 50    | 42 46 | 50    |
|          | 47    |     |     |     | 47     |       | 47    |       |
|          | 50    |     |     |     | 49     |       |       |       |
|          |       |     |     |     | 50     |       |       |       |
