# Supplementary material for: Two-Phase Analysis in Consensus Genetic Mapping
Source: PubMed Central journal article supplement (PMC3362937; doi:10.1534/g3.112.002428), 2012-05-01
Supplement: supp_2.5.537_TableS3.pdf [file supp_2.5.537_TableS3.pdf]

**Table S3 The lengths of the chromosomes after individual and consensus analysis allowing to detect the chromosomes with high cost of consensus ordering: data on six BC maize sets**

| Chr # | Phase             | set1  | set2  | set3  | set4  | set5  | set6  |
|-------|-------------------|-------|-------|-------|-------|-------|-------|
| 1     | <i>before</i>     | 243.6 | 212.0 | 226.8 | 184.9 | 202.5 | 234.2 |
|       | <i>after</i>      | 245.7 | 212.1 | 226.8 | 184.9 | 203.6 | 234.2 |
| 2     | <i>before</i>     | 146.5 | 144.8 | 121.2 | 60.5  | 170.3 | 95.5  |
|       | <i>after</i>      | 146.5 | 167.6 | 123.4 | 61.5  | 170.4 | 95.5  |
|       | <i>after-crt</i>  | 146.5 | 144.8 | 123.4 | 61.5  | 170.3 | 95.5  |
| 3     | <i>before</i>     | 154.1 | 167.8 | 147.9 | 172.8 | 140.3 | 117.0 |
|       | <i>after</i>      | 154.1 | 167.8 | 147.9 | 172.8 | 144.6 | 117.0 |
| 4     | <i>before</i>     | 100.6 | 158.9 | 142.0 | 144.4 | 123.9 | 105.2 |
|       | <i>after</i>      | 100.6 | 158.7 | 142.0 | 144.4 | 123.9 | 105.2 |
| 5     | <i>before</i>     | 143.5 | 157.5 | 158.3 | 162.3 | 136.2 | 151.2 |
|       | <i>before-crt</i> | 143.5 | 157.5 | 135.2 | 162.3 | 136.2 | 151.2 |
|       | <i>after</i>      | 143.5 | 157.5 | 166.4 | 163.5 | 136.2 | 151.2 |
|       | <i>after-crt</i>  | 143.5 | 157.5 | 137.8 | 163.5 | 136.2 | 151.2 |
| 6     | <i>before</i>     | 104.5 | 139.6 | 53.6  | 120.9 | 125.6 | 83.4  |
|       | <i>after</i>      | 104.5 | 139.8 | 53.6  | 211.8 | 128.9 | 83.4  |
|       | <i>after-crt</i>  | 104.5 | 139.7 | 53.6  | 120.7 | 125.7 | 83.4  |
| 7     | <i>before</i>     | 111.9 | 139.8 | 191.7 | 111.8 | 124.3 | 92.0  |
|       | <i>before-crt</i> | 111.9 | 139.8 | 162.8 | 111.8 | 124.3 | 92.0  |
|       | <i>after</i>      | 111.9 | 139.8 | 200.6 | 111.8 | 124.3 | 92.0  |
| 8     | <i>after-crt</i>  | 111.9 | 139.8 | 167.2 | 111.8 | 124.3 | 92.0  |
|       | <i>before</i>     | 133.4 | 141.8 | 114.5 | 104.6 | 145.7 | 86.7  |
| 9     | <i>after</i>      | 133.4 | 141.8 | 121.0 | 104.6 | 145.7 | 86.7  |
|       | <i>before</i>     | 132.3 | 119.1 | 136.3 | 139.8 | 97.8  | 46.2  |
| 10    | <i>after</i>      | 132.3 | 119.1 | 136.3 | 139.8 | 97.8  | 46.2  |
|       | <i>before</i>     | 97.2  | 114.1 | 112.1 | 75.9  | 109.3 | 58.9  |
|       | <i>after</i>      | 97.2  | 114.2 | 115.3 | 75.9  | 111.5 | 58.9  |

Notes: *before* – the lengths (in cM) of the map variants after individual analysis of separate sets but before the consensus analysis; *before-crt* – the same as *before* but after removing some markers of chromosomes 5 and 7 in set #3; *after* - the lengths of the map variants after the consensus analysis; *after-crt* – the same as *after* but after removing some markers of set2-Chr2, set3-Chr5, set4-Chr6, and set3-Chr7
