# Supplementary material for: Two-Phase Analysis in Consensus Genetic Mapping
Source: PubMed Central journal article supplement (PMC3362937; doi:10.1534/g3.112.002428), 2012-05-01
Supplement: supp_2.5.537_TableS4.pdf [file supp_2.5.537_TableS4.pdf]

**Table S4** The lengths of the chromosomes after individual and consensus analysis allowing to detect the chromosomes with high cost of consensus ordering: data on 24 RIL maize sets

| Chr   | b/<br>a | Sets (mapping populations) |           |            |           |       |           |           |       |            |            |            |            |
|-------|---------|----------------------------|-----------|------------|-----------|-------|-----------|-----------|-------|------------|------------|------------|------------|
| Chr 1 |         | set1                       | set2      | set3       | set4      | set5  | set6      | set7      | set8  | set9       | set10      | set11      | set12      |
|       | b       | 170.5                      | 158.1     | 198.3      | 160.8     | 201.2 | 175.2     | 151.8     | 180.7 | 166.8      | 164.1      | 160.2      | 157.2      |
|       | a       | 170.6                      | 159.6     | 199.7      | 161.5     | 203.3 | 175.6     | 153.4     | 182.0 | 169.0      | 164.9      | 161.2      | 159.8      |
|       |         | set1<br>4                  | set1<br>5 | set16      | set1<br>8 | set19 | set2<br>0 | set2<br>1 | set22 | set23      | set24<br>* | set25<br>* | set26      |
|       | b       | 166.8                      | 143.1     | 157.2      | 149.8     | 172.2 | 188.8     | 131.0     | 165.1 | 113.1      | 134.4      | 139.1      | 179.3      |
|       | a       | 170.1                      | 143.1     | 157.3      | 150.3     | 172.8 | 189.4     | 131.0     | 165.8 | 113.9      | 134.8      | 139.5      | 179.6      |
| Chr 2 |         | set1                       | set2      | set3       | set4      | set5  | set6      | set7      | set8  | set9       | set10      | set11      | set12      |
|       | b       | 131.5                      | 120.9     | 161.1      | 124.5     | 133.4 | 150.2     | 134.0     | 143.3 | 123.3      | 136.2      | 123.1      | 148.1      |
|       | a       | 132.0                      | 122.1     | 161.4      | 126.1     | 134.1 | 150.2     | 134.4     | 143.8 | 124.0      | 137.1      | 123.1      | 148.8      |
|       |         | set1<br>4                  | set1<br>5 | set16<br>* | set1<br>8 | set19 | set2<br>0 | set2<br>1 | set22 | set23<br>* | set24<br>* | set25      | set26<br>* |
|       | b       | 112.1                      | 103.3     | 43.3       | 116.3     | 121.8 | 138.4     | 64.9      | 131.2 | 44.5       | 39.1       | 145.8      | 35.0       |
|       | a       | 112.4                      | 103.3     | 43.5       | 116.7     | 121.8 | 138.7     | 64.9      | 132.0 | 44.9       | 39.2       | 145.8      | 35.0       |
| Chr 3 |         | set1<br>*                  | set2      | set3       | set4      | set5  | set6      | set7      | set8  | set9       | set10      | set11      | set12      |
|       | b       | 77.1                       | 127.8     | 137.4      | 138.5     | 32.9  | 97.2      | 118.0     | 144.8 | 120.1      | 145.6      | 140.1      | 143.5      |
|       | a       | 77.1                       | 128.9     | 138.3      | 138.7     | 34.0  | 97.6      | 118.0     | 144.8 | 120.3      | 146.9      | 140.3      | 143.8      |
|       |         | set1<br>4                  | set1<br>5 | set16      | set1<br>8 | set19 | set2<br>0 | set2<br>1 | set22 | set23      | set24      | set25      | set26      |
|       | b       | 125.0                      | -         | 117.5      | 107.2     | 114.8 | 137.8     | 135.7     | 113.1 | -          | 54.4       | 98.3       | 80.0       |
|       | a       | 125.1                      | -         | 118.4      | 107.2     | 115.2 | 138.1     | 135.7     | 113.1 | -          | 54.9       | 98.3       | 80.0       |
| Chr 4 |         | set1                       | set2      | set3       | set4      | set5* | set6      | set7      | set8  | set9       | set10      | set11      | set12      |
|       | b       | 121.3                      | 121.6     | 132.9      | 99.0      | 59.8  | 65.4      | 97.4      | 109.7 | 111.4      | 112.0      | 77.4       | 72.0       |
|       | a       | 121.6                      | 121.9     | 133.2      | 99.6      | 60.4  | 65.4      | 97.9      | 109.8 | 112.0      | 112.0      | 77.4       | 72.0       |
|       |         | set1<br>4                  | set1<br>5 | set16      | set1<br>8 | set19 | set2<br>0 | set2<br>1 | set22 | set23      | set24      | set25      | set26      |
|       | b       | 93.1                       | 49.2      | 103.4      | 103.1     | 113.5 | 114.9     | 51.5      | 125.8 | 19.5       | -          | 130.7      | 97.3       |
|       | a       | 93.1                       | 49.2      | 103.4      | 103.1     | 113.5 | 114.9     | 51.8      | 126.1 | 19.6       | -          | 131.3      | 100.7      |
| Chr 5 |         | set1                       | set2      | set3       | set4      | set5  | set6      | set7      | set8  | set9       | set10      | set11      | set12      |
|       | b       | 116.                       | 101.      | 134.6      | 128.      | 149.8 | 147.      | 122.      | 143.8 | 136.4      | 129.2      | 119.0      | 106.5      |

|   |       |       |       |       |       |       |       |       |       |       |       |       |
|---|-------|-------|-------|-------|-------|-------|-------|-------|-------|-------|-------|-------|
|   | 2     | 4     |       | 9     |       | 4     | 6     |       |       |       |       |       |
| a | 116.9 | 101.5 | 137.0 | 130.1 | 150.4 | 148.1 | 123.2 | 145.0 | 136.6 | 129.5 | 119.1 | 107.4 |
|   | set1  | set1  | set16 | set1  | set19 | set2  | set2  | set22 | set23 | set24 | set25 | set26 |
|   | 4     | 5     |       | 8     | *     | 0     | 1     | *     |       |       |       |       |
| b | 113.1 | -     | 104.0 | 121.6 | 77.8  | 104.2 | 91.2  | 65.3  | -     | 91.2  | 96.5  | 67.5  |
| a | 115.8 | -     | 104.9 | 122.8 | 78.4  | 106.3 | 91.9  | 66.2  | -     | 91.2  | 97.1  | 67.6  |

Table 4s continued

|       |        |        |        |       |       |        |       |       |       |       |       |        |
|-------|--------|--------|--------|-------|-------|--------|-------|-------|-------|-------|-------|--------|
| Chr6  | set1   | set2   | set3   | set4  | set5  | set6   | set7* | set8  | set9  | set10 | set11 | set12  |
| b     | 77.4   | 92.5   | 95.2   | 79.7  | 96.1  | 95.0   | 39.0  | 101.1 | 50.1  | 88.7  | 83.8  | 90.5   |
| a     | 77.4   | 93.6   | 99.0   | 79.9  | 96.2  | 95.0   | 39.0  | 101.4 | 51.0  | 88.7  | 83.8  | 90.6   |
|       | set14  | set15  | set16  | set18 | set19 | set20* | set21 | set22 | set23 | set24 | set25 | set26  |
| b     | 85.9   | 100.0  | 82.4   | 90.6  | 86.1  | 38.8   | 41.8  | 87.9  | 15.4  | 58.2  | 101.3 | 107.1  |
| a     | 86.2   | 100.8  | 82.4   | 90.8  | 86.5  | 38.8   | 42.4  | 88.2  | 15.4  | 58.2  | 101.3 | 107.1  |
| Chr7  | set1   | set2   | set3*  | set4* | set5  | set6   | set7  | set8  | set9  | set10 | set11 | set12  |
| b     | 106.5  | 103.8  | 58.8   | 45.1  | 65.9  | 101.7  | 87.2  | 108.4 | 118.8 | 110.0 | 105.7 | 109.3  |
| a     | 106.9  | 103.8  | 59.2   | 45.1  | 65.9  | 101.7  | 87.2  | 112.8 | 118.8 | 110.2 | 105.9 | 109.6  |
|       | set14  | set15* | set16  | set18 | set19 | set20  | set21 | set22 | set23 | set24 | set25 | set26  |
| b     | 114.6  | 49.3   | 107.9  | 81.9  | 108.9 | 68.0   | 71.4  | 110.5 | 49.4  | 0.3   | 114.5 | 105.6  |
| a     | 115.3  | 49.3   | 108.3  | 82.2  | 109.8 | 68.0   | 71.7  | 117.4 | 49.5  | 0.3   | 114.5 | 107.6  |
| Chr8  | set1   | set2   | set3   | set4  | set5  | set6   | set7  | set8  | set9  | set10 | set11 | set12  |
| b     | 107.1  | 113.3  | 121.0  | 91.2  | 101.3 | 110.9  | 69.0  | 115.7 | 117.5 | 116.4 | 98.4  | 97.1   |
| a     | 107.4  | 113.6  | 121.7  | 92.0  | 101.6 | 110.9  | 69.0  | 116.1 | 117.6 | 116.4 | 98.8  | 97.1   |
|       | set14  | set15  | set16  | set18 | set19 | set20  | set21 | set22 | set23 | set24 | set25 | set26  |
| b     | 93.5   | 79.2   | 105.7  | 99.1  | 101.9 | 96.8   | 117.5 | 117.2 | 62.0  | 65.4  | 68.7  | 116.0  |
| a     | 94.1   | 79.3   | 106.0  | 99.1  | 102.3 | 96.8   | 117.5 | 117.5 | 62.0  | 65.4  | 68.7  | 116.8  |
| Chr9  | set1   | set2   | set3   | set4  | set5  | set6   | set7  | set8  | set9  | set10 | set11 | set12  |
| b     | 89.4   | 93.2   | 105.5  | 97.8  | 65.9  | 76.9   | 91.1  | 104.5 | 93.7  | 105.7 | 110.0 | 94.6   |
| a     | 89.9   | 94.1   | 110.8  | 98.5  | 65.9  | 77.3   | 91.7  | 104.5 | 94.1  | 106.3 | 110.9 | 94.6   |
|       | set14  | set15  | set16* | set18 | set19 | set20  | set21 | set22 | set23 | set24 | set25 | set26  |
| b     | 85.4   | 80.4   | 59.7   | 90.6  | 92.2  | 76.5   | 89.2  | 94.5  | 48.4  | 15.5  | 106.7 | 106.5  |
| a     | 85.5   | 81.2   | 62.6   | 92.0  | 92.5  | 76.6   | 132.9 | 94.5  | 50.2  | 15.5  | 106.7 | 106.9  |
| Chr10 | set1   | set2   | set3   | set4  | set5  | set6   | set7  | set8  | set9  | set10 | set11 | set12  |
| b     | 71.6   | 92.8   | 98.3   | 89.8  | -     | 74.2   | 77.2  | 81.4  | 82.9  | 90.4  | 91.0  | 80.1   |
| a     | 71.6   | 93.6   | 98.3   | 90.5  | -     | 74.2   | 77.7  | 81.4  | 82.9  | 90.4  | 91.0  | 80.1   |
|       | set14* | set15  | set16  | set18 | set19 | set20  | set21 | set22 | set23 | set24 | set25 | set26* |
| b     | 53.1   | 81.8   | 80.7   | 73.2  | 86.8  | 103.1  | 75.8  | 84.5  | 34.6  | 58.1  | 88.6  | 6.4    |
| a     | 53.1   | 81.8   | 81.0   | 73.6  | 86.8  | 103.1  | 75.8  | 84.8  | 34.6  | 58.1  | 89.0  | 6.4    |

Notes: b and a – represent two phases, *before* and *after* of the proposed consensus mapping approach. Set-chromosome combinations with high or moderate cost of consensus are marked by frames (especially set21-Chr9). The situation with set21-Chr9 is discussed in more detail in the text. \* marks the sets where the considered chromosome is represented by several fragment (linkage groups); for such cases the sum of the fragment lengths (in cM) is presented.
